# Supplementary material for: PU.1 target genes undergo Tet2-coupled demethylation and DNMT3b-mediated methylation in monocyte-to-osteoclast differentiation
Source: PubMed Central journal article supplement (PMC4054781; doi:10.1186/gb-2013-14-9-r99), 2013-09-12

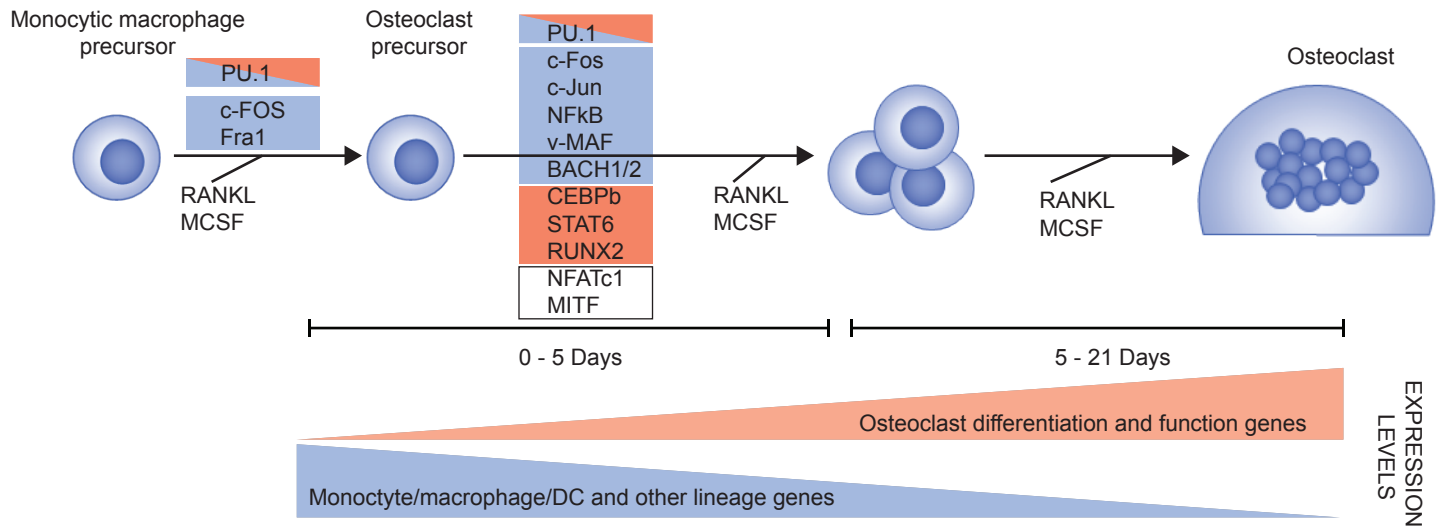

Supplement: gb-2013-14-9-r99-S9.pdf [file gb-2013-14-9-r99-S9.pdf]
